# Supplementary material for: Antiproliferative Effects of Cynara Cardunculus in Colorectal Cancer Cells Are Modulated by the Circadian Clock
Source: MDPI journal article supplement (doi:10.3390/ijms23169130), 2022-08-15
Supplement: s1 [file s1]

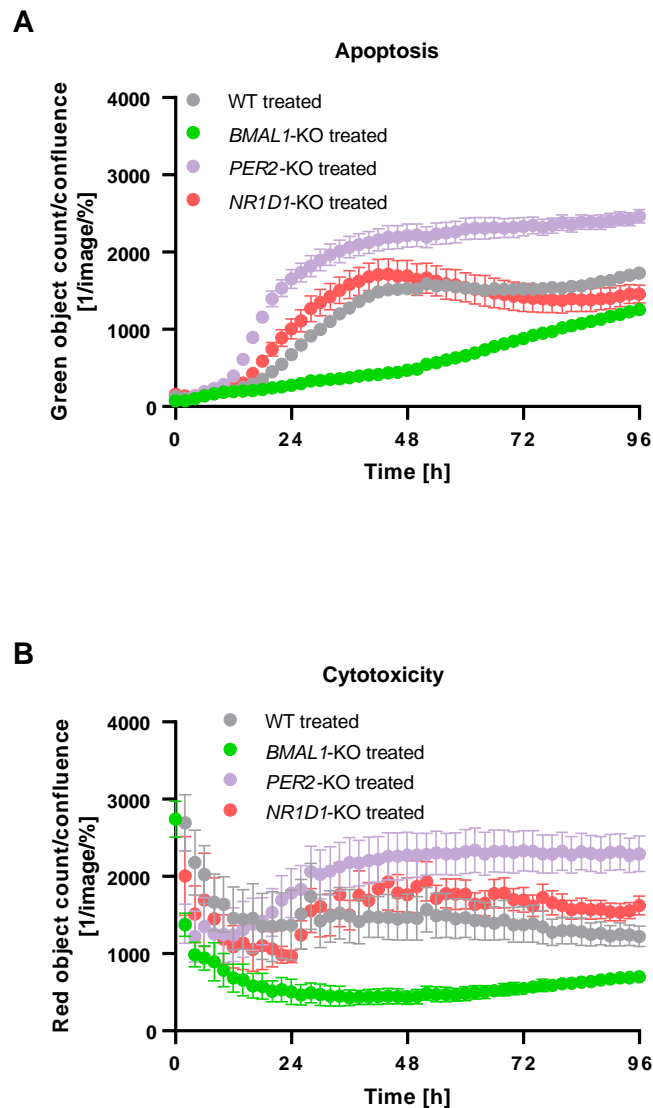

**Figure S1. Effect of *C. cardunculus* treatment on apoptosis and overall cell cytotoxicity.** (A) all treated conditions (WT and KO) ( $n \geq 6$ , mean  $\pm$  SEM,  $p < 0.0001$  for apoptosis comparing AUC of treated HCT116-BMAL1-KO cells and HCT116-PER2-KO cells to treated WT, one-way ANOVA with Tukey's multiple comparisons test). (B) all treated conditions (WT and KO) ( $n \geq 6$ , mean  $\pm$  SEM,  $p < 0.02$  for cytotoxicity comparing AUC of treated Kos to treated WT, one-way ANOVA with Tukey's multiple comparisons test).

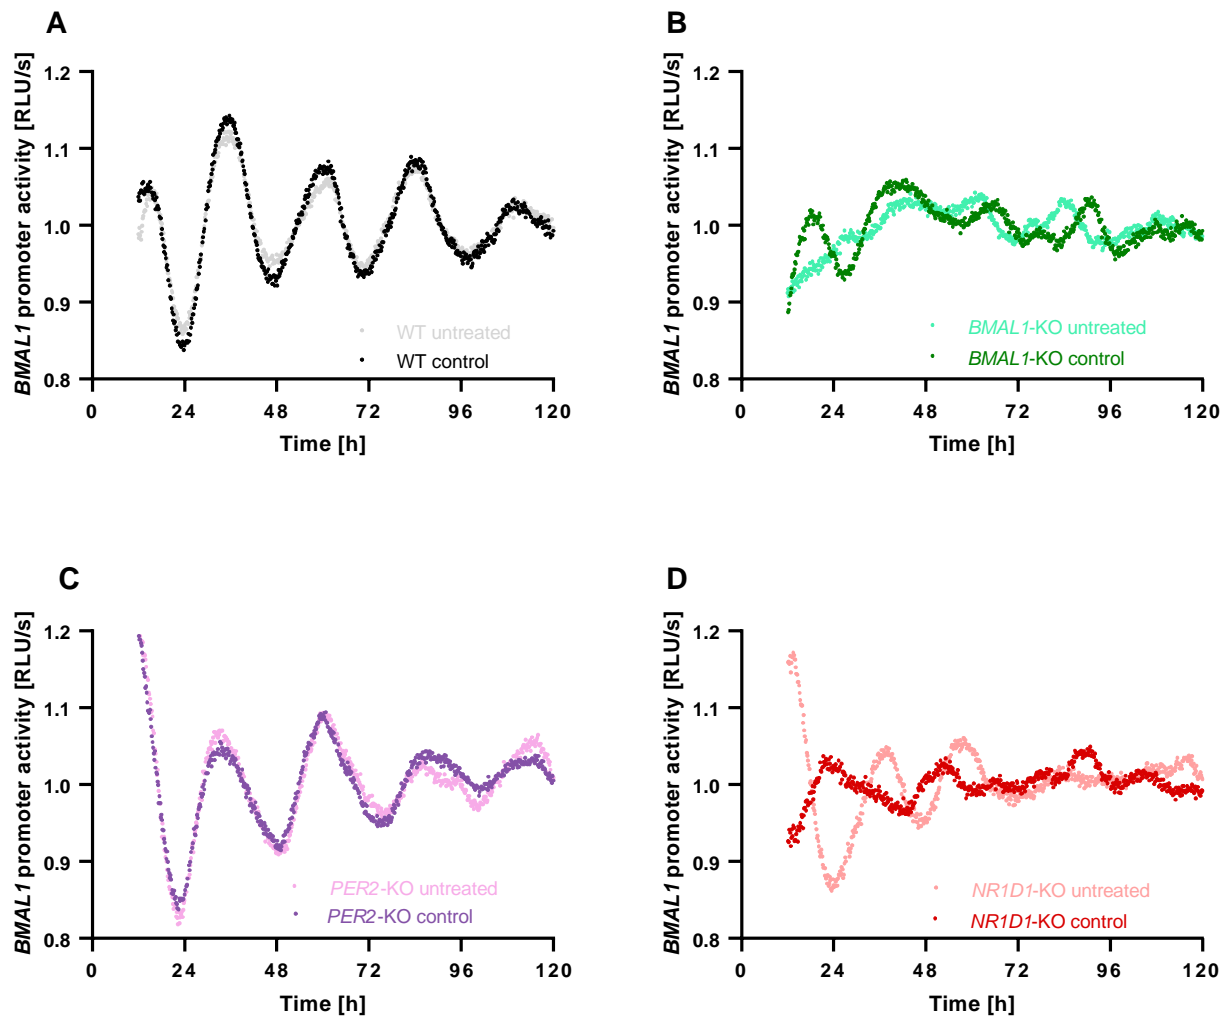

**Figure S2. *BMAL1*-promoter activity in HCT116 cells harboring different core-clock knockouts.** Cells were lentivirally transduced with a *BMAL1*-luciferase construct (BLP) and synchronized with medium change. Cells were either untreated or treated with a vehicle control (ethanol). Bioluminescence was measured for five consecutive days. Displayed is one representative replicate for each condition. (A) Bioluminescence recordings of *BMAL1*-promoter activity in HCT116-WT cells, (B) Bioluminescence recordings of *BMAL1*-promoter activity in HCT116-*BMAL1*-KO cells, (C) Bioluminescence recordings of *BMAL1*-promoter activity in HCT116-*PER2*-KO cells, (D) Bioluminescence recordings of *BMAL1*-promoter activity in HCT116-*NR1D1*-KO cells.
